# Supplementary material for: Genome-Wide Identification and Gene Expression Analysis of Sweet Cherry Aquaporins (Prunus avium L.) under Abiotic Stresses
Source: MDPI journal article supplement (doi:10.3390/genes14040940), 2023-04-19
Supplement: s1 [file s1]

Table S1: List of qPCR primers for *Pruav*AQPs.

| Gene                | Forward Primer (5' - 3') | Reverse Primer (5' - 3')  |
|---------------------|--------------------------|---------------------------|
| <i>Pruav</i> PIP1;1 | AGGGAAAGAAGAAGATGTGAGG   | GTGATGTAGAGGAACAAGAAGGTG  |
| <i>Pruav</i> PIP1;2 | CCTGGTTTCCTTTCGTTTTTA    | AATGGTCGGTGTTATTTCTGA     |
| <i>Pruav</i> PIP1;3 | GCTTGGGATGACCATTTGGATC   | AGGAAAATTAGCCCCTGGACTTG   |
| <i>Pruav</i> PIP2;1 | GATATAGTCAGGTTGAAAAGGGA  | GAAGAAAGGAGGAGAGATGGA     |
| <i>Pruav</i> PIP2;2 | ATTCTGAGAGCAGGAGCCATTA   | CTTTGAGCCCTTGAGAGAGACA    |
| <i>Pruav</i> PIP2;3 | GGGTTTGCTGTGTTTATTGTG    | GCTCCTGCTCTCAGTATGTATTG   |
| <i>Pruav</i> PIP2;4 | CTTTGGTCCTGCTGTGATTTTC   | CTTCCTTTTTTCATCTCCCTCTCT  |
| <i>Pruav</i> NIP1;1 | CAAACCCAACCAAGAATCAAGCAG | ACCATCACAACCAGTCCCCAAA    |
| <i>Pruav</i> NIP2;1 | AGCACATACTACAAGGGAATCTGG | CAAATGAGCGTGCTGGAGGT      |
| <i>Pruav</i> NIP4;1 | CGTGGTATTTATCGGGTGTGG    | GCGAAAGATGGCAAAGGTG       |
| <i>Pruav</i> NIP4;2 | CCAGGAACCAATACAAGCGA     | CACAGCCACCGAACCACAC       |
| <i>Pruav</i> NIP5;1 | GCAGGACCTATTGTGAATGAGAA  | TATTATGTAGAGGGGACTTGGG    |
| <i>Pruav</i> NIP5;2 | AAGTGCTTGCTGTGAAGGC      | ATGAGGATGAAGGTTCCGACAA    |
| <i>Pruav</i> NIP6;1 | CAGAAGCAGTGGGATTGGTAG    | AAGTGAGACAGGAGGGTGAGG     |
| <i>Pruav</i> NIP7;1 | ATCAAGAAATGGGCTCTAATGC   | ATAAAAGTCCCCACCATCTCTG    |
| <i>Pruav</i> TIP1;1 | GGTCACATTACCGTCTTCCG     | AGTATCCCACCCCACTTGC       |
| <i>Pruav</i> TIP1;2 | CTGGTGGTGCGTTTGATGGT     | TTGTTGGGTAGGGGTTCGTG      |
| <i>Pruav</i> TIP1;3 | ACTGACGGTGCTTCAACGAC     | CAAGACAGACCTGACGAGAGAGAT  |
| <i>Pruav</i> TIP1;4 | AACATTTTGGCGGGTGGGG      | AGTAATCAGCGGTGCGGAGTGG    |
| <i>Pruav</i> TIP2;1 | GCACCCTTAGTCAACGAGTATT   | GCCTGGCTTCACCAACTTC       |
| <i>Pruav</i> TIP2;2 | AGGGTTCACTGGGAATCATAGCA  | AATGAAAATGTCACCATAGACGAGC |
| <i>Pruav</i> TIP3;1 | GATAGCGGCACATCAGCAGC     | GCCACAATAGCCCCAAGGAG      |
| <i>Pruav</i> TIP5;1 | CTGTTGTGGGCTCTATGATGTC   | CCATCTGAGAAATCCAATAGCA    |
| <i>Pruav</i> SIP1;1 | TTTCACAGTCATCATCGCCTCG   | GCAGTGGTGGAGGGGTTGAA      |
| <i>Pruav</i> SIP1;2 | ACTCAAGGGTCTCGTAGCC      | CTATGAAAGGGCAAATCCAAT     |
| <i>Pruav</i> SIP2;1 | CTGTGATGGGATGGGCTTATG    | TCTACCTTTTCCTCTTTTATGTGTG |
| <i>Pruav</i> XIP1;1 | GTGGGCATAACAGTGGCTTT     | GCCGTCCCTGTGATTGTTAT      |
| <i>Pruav</i> XIP2;1 | ACCAATGGGGCTAGGAGTTT     | CTTACCAATGCAGGGCCTAA      |
